# Supplementary material
Source: Springer Nature journal article supplement (https://www.springermedizin.de/resource/supplementary/13550_2013_159_MOESM7_ESM.pdf/9687718)
Supplement: MOESM7 [file 9687718]

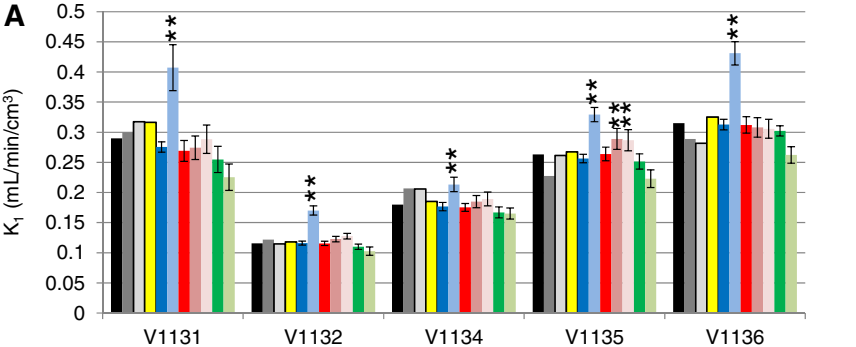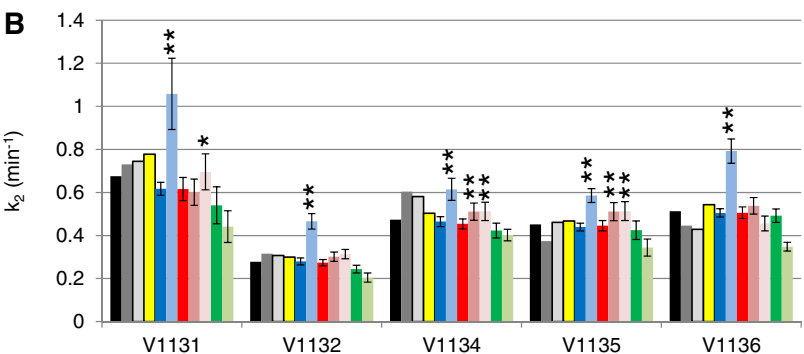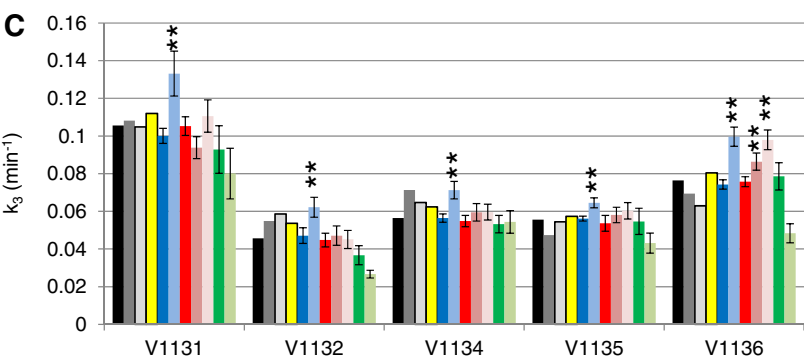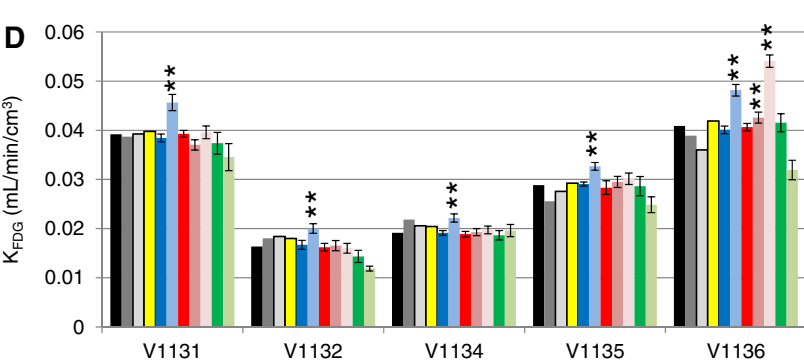

IF experimental

IF experimental, 30 s intervals

IF experimental, 60 s intervals

IF fit

Simulation 10 s bolus, 1 s intervals

Simulation 10 s bolus, 30 s intervals

Simulation 300 s infusion, 1 s intervals

Simulation 300 s infusion, 30 s intervals

Simulation 300 s infusion, 60 s intervals

Simulation 900 s infusion, 1 s intervals

Simulation 900 s infusion, 30 s intervals
